# Supplementary material
Source: MDPI journal article supplement (https://www.mdpi.com/2076-3417/12/10/4994)
Supplement: s1 [file s1]

## Supplementary Material for

# Nanomechanical characterization of bacterial polyhydroxyalkanoates using atomic force microscopy

Simone Bagatella <sup>1,\*</sup>, Riccardo Ciapponi <sup>1</sup> and Stefano Turri <sup>1</sup>

<sup>1</sup> Dipartimento di Chimica, Materiali e Ingegneria Chimica "Giulio Natta", Politecnico di Milano; Piazza Leonardo da Vinci 32, Milan (Italy)

\* Correspondence: [simone.bagatella@polimi.it](mailto:simone.bagatella@polimi.it)

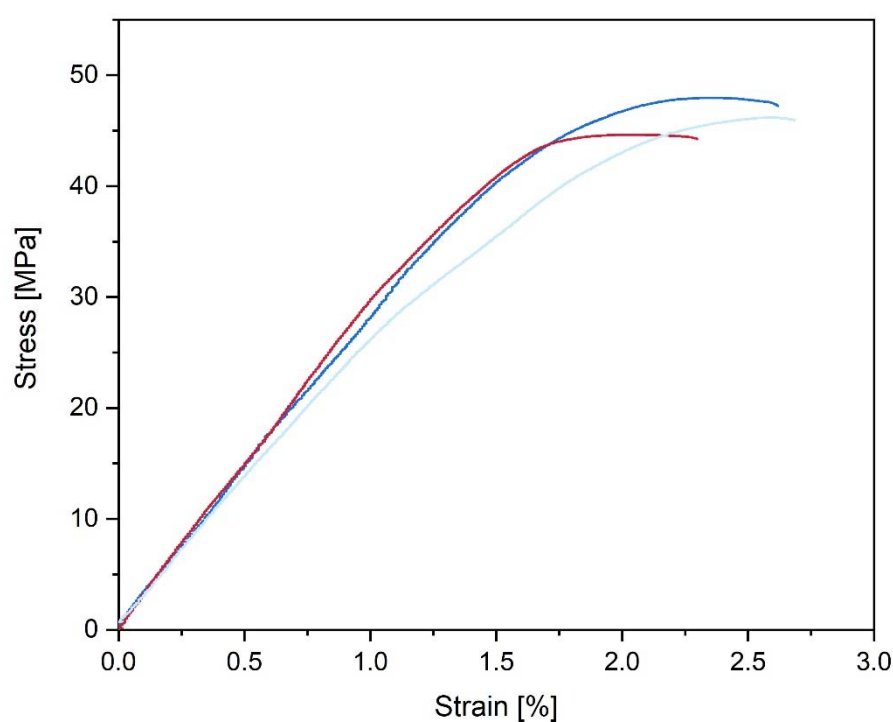

**Figure S1** Example of stress-strain curves for PLA

Figure S1 shows examples of the stress-strain curves obtained for dumbbell-shaped specimens of PLA.
